# Supplementary material for: Detection of Acetoin and Diacetyl by a Tobacco Mosaic Virus-Assisted Field-Effect Biosensor
Source: MDPI journal article supplement (doi:10.3390/chemosensors10060218), 2022-06-08
Supplement: s1 [file s1]

Supplementary Information

# Detection of Acetoin and Diacetyl by a Tobacco Mosaic Virus-Assisted Field-Effect Biosensor

Melanie Welden <sup>1,2</sup>, Robin Severins <sup>1</sup>, Arshak Poghosian <sup>3</sup>, Christina Wege <sup>4</sup>, Johannes Bongaerts <sup>1</sup>, Petra Siegert <sup>1</sup>, Michael Keusgen <sup>2</sup> and Michael J. Schöning <sup>1,5,\*</sup>

<sup>1</sup> Institute of Nano- and Biotechnologies, Aachen University of Applied Sciences, 52428 Jülich, Germany; m.welden@fh-aachen.de (M.W.); severins@fh-aachen.de (R.S.); bongaerts@fh-aachen.de (J.B.); siegert@fh-aachen.de (P.S.)

<sup>2</sup> Institute of Pharmaceutical Chemistry, Philipps University Marburg, 35032 Marburg, Germany; michael.keusgen@staff.uni-marburg.de

<sup>3</sup> MicroNanoBio, 40479 Düsseldorf, Germany; a.poghosian@gmx.de

<sup>4</sup> Institute of Biomaterials and Biomolecular Systems, University of Stuttgart, 70569 Stuttgart, Germany; christina.wege@bio.uni-stuttgart.de

<sup>5</sup> Institute of Biological Information Processing (IBI-3), Forschungszentrum Jülich GmbH, 52425 Jülich, Germany

\* Correspondence: schoening@fh-aachen.de

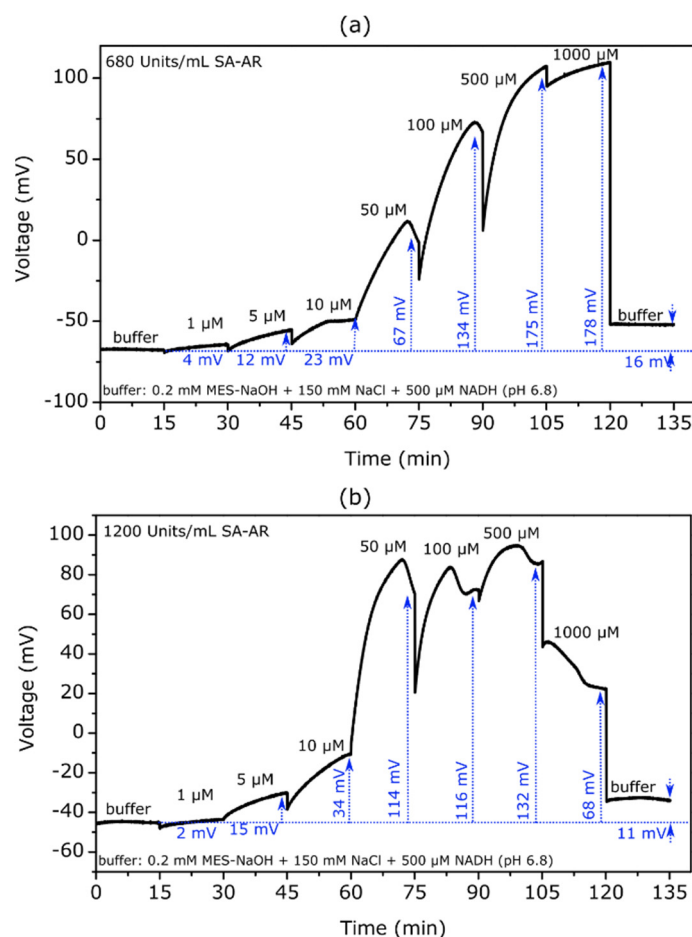

**Figure S1.** Exemplary constant capacitance curve recorded with a TMV-assisted EISCAP modified with 680 Units/mL streptavidin-conjugated acetoin reductase (SA-AR) (a) and 1200 Units/mL SA-AR (b), respectively. The measurements were performed in 0.2 mM MES-NaOH + 150 mM NaCl + 500 μM NADH (pH 6.0) with varying diacetyl concentrations between 1 μM and 1000 μM.
